# Supplementary material for: Comparison of Gene Expression Profiles in Chromate Transformed BEAS-2B Cells
Source: PLoS One. 2011 Mar 18;6(3):e17982. doi: 10.1371/journal.pone.0017982 (PMC3060877; doi:10.1371/journal.pone.0017982)
Supplement: Table S2 — Complete list of 91 genes shared similar expression changes in both Cr(VI) transformed and control cells. (XLS) [file pone.0017982.s002.xls]

## Sheet: common_UP
Supplemental Table 2. Complete list of 91 genes shared similar expression changes in both Cr(VI) transformed and control cells.
Transcripts Cluster Id	Fold change	Fold change(Cr_small vs BEAS-2B)	Fold change(Cr_large vs BEAS-2B)	genesymbol	genedescription
8025402	19.9661	14.5111	14.137	ANGPTL4	angiopoietin-like 4
7942123	3.12951	6.28768	7.28243	CCND1	cyclin D1
8066214	2.33273	6.20653	7.18857	TGM2	transglutaminase 2 (C polypeptide, protein-glutamine-gamma-glutamyltransferase)
8120967	2.79727	5.04702	6.94675	NT5E	5'-nucleotidase, ecto (CD73)
8152512	2.91471	8.99995	5.75818	TNFRSF11B	tumor necrosis factor receptor superfamily, member 11b (osteoprotegerin)
7939546	2.11343	6.05602	5.39459	CD82	CD82
8092578	2.03185	3.75289	4.53361	ETV5	ets variant gene 5 (ets-related molecule)
7934979	3.26074	3.75176	4.2747	ANKRD1	ankyrin repeat domain 1 (cardiac muscle)
7938295	2.44739	6.33444	3.95847	RPL27A	ribosomal protein L27a
8139488	2.64725	3.34669	3.64432	IGFBP3	insulin-like growth factor binding protein 3
8075310	6.17207	3.60249	3.60555	LIF	leukemia inhibitory factor (cholinergic differentiation factor)
8142981	2.25476	2.85041	3.40423	PODXL	podocalyxin-like
7986350	2.31236	4.01391	3.36172	ARRDC4	arrestin domain containing 4
8135069	3.24469	3.07227	3.34538	SERPINE1	serpin peptidase inhibitor, clade E (nexin, plasminogen activator inhibitor type 1), member 1
7938485	2.49515	4.00422	3.2827	MICAL2	microtubule associated monoxygenase, calponin and LIM domain containing 2
7953012	2.1393	3.09305	3.27791	WNT5B	wingless-type MMTV integration site family, member 5B
8114797	3.28695	3.12122	3.16923	SPRY4	sprouty homolog 4 (Drosophila)
7972713	2.48175	3.35284	3.15555	EFNB2	ephrin-B2
8115490	2.30804	2.58509	3.00258	ADAM19	ADAM metallopeptidase domain 19 (meltrin beta)
8058390	2.16791	3.01477	2.80314	RAPH1	Ras association (RalGDS/AF-6) and pleckstrin homology domains 1
7912706	2.58036	2.86013	2.73225	EPHA2	EPH receptor A2
7995838	3.60595	2.66818	2.7168	MT1X	metallothionein 1X
8023727	2.2689	3.28562	2.67442	DSEL	dermatan sulfate epimerase-like
8103822	3.29821	2.66057	2.61739	VEGFC	vascular endothelial growth factor C
8150698	3.98859	2.4425	2.60392	SNAI2	snail homolog 2 (Drosophila)
8112592	2.90668	3.00313	2.60086	FOXD1	forkhead box D1
8072678	2.46448	2.42245	2.58359	HMOX1	heme oxygenase (decycling) 1
8013312	3.03133	2.18406	2.56372	FAM83G	family with sequence similarity 83, member G
7944722	2.57094	2.69693	2.54898	UBASH3B	ubiquitin associated and SH3 domain containing, B
8123936	2.51025	2.11265	2.42975	NEDD9	neural precursor cell expressed, developmentally down-regulated 9
8053278	2.39147	2.04947	2.38644	TMEM166	transmembrane protein 166
8094301	3.18993	4.29124	2.38231	SLIT2	slit homolog 2 (Drosophila)
8107194	2.21485	2.20349	2.37001	C5orf30	chromosome 5 open reading frame 30
7965335	2.45833	2.54409	2.34795	DUSP6	dual specificity phosphatase 6
8154163	2.20239	2.51307	2.29632	RCL1	RNA terminal phosphate cyclase-like 1
7954090	2.91145	2.27204	2.25677	EMP1	epithelial membrane protein 1
7990345	5.67967	2.42935	2.21599	SEMA7A	semaphorin 7A, GPI membrane anchor (John Milton Hagen blood group)
8152215	2.73043	2.07322	2.19303	KLF10	Kruppel-like factor 10
7995783	2.28206	2.2804	2.13314	MT2A	metallothionein 2A
8162531	2.19931	2.16582	2.11369	MT1G	metallothionein 1G
8167797	2.04775	2.24467	2.01724	GNL3L	guanine nucleotide binding protein-like 3 (nucleolar)-like

## Sheet: common_down
Transcripts Cluster Id	Fold change([A] vs [D]) ( control_Fold change >= 2.0 )	Fold change([B] vs [D]) ( small_Fold change >= 2.0 )	Fold change([C] vs [D]) ( big_Fold change >= 2.0 )	genesymbol	genedescription
7912537	2.81248	3.06233	3.01658	DHRS3	dehydrogenase/reductase (SDR family) member 3
7913566	3.03265	3.51982	2.73452	HTR1D	5-hydroxytryptamine (serotonin) receptor 1D
7939559	2.25649	2.94712	2.57133	TSPAN18	tetraspanin 18
7947512	4.8122	5.6902	4.80994	DKFZP586H2123	regeneration associated muscle protease
7951686	2.00316	5.89939	2.99961	IL18	interleukin 18 (interferon-gamma-inducing factor)
7952205	3.24632	3.29104	3.16463	MCAM	melanoma cell adhesion molecule
7953943	2.94678	3.04368	2.55086	GABARAPL1	GABA(A) receptor-associated protein like 1
7954029	2.47859	2.79379	3.24083	CDKN1B	cyclin-dependent kinase inhibitor 1B (p27, Kip1)
7962559	2.27982	3.06456	2.98743	SLC38A4	solute carrier family 38, member 4
7964119	2.15282	2.36408	2.63334	STAT2	signal transducer and activator of transcription 2, 113kDa
7970301	2.26116	2.42003	2.21287	TMCO3	transmembrane and coiled-coil domains 3
7972579	2.05649	2.41929	2.45514	TMTC4	transmembrane and tetratricopeptide repeat containing 4
7973306	2.0191	3.30193	3.31353	ABHD4	abhydrolase domain containing 4
7975390	2.14584	2.24829	2.27187	SMOC1	SPARC related modular calcium binding 1
7979241	4.10718	3.3483	3.48701	BMP4	bone morphogenetic protein 4
7981427	2.98736	2.29825	2.57893	CKB	creatine kinase, brain
7983650	8.32109	2.71358	3.16325	SLC27A2	solute carrier family 27 (fatty acid transporter), member 2
7986509	3.03184	3.9317	3.14856	LOC441734	similar to hypothetical protein DKFZp434I1020
7986527	3.02585	3.92502	3.14716	C15orf51	chromosome 15 open reading frame 51
7990774	4.553	3.83319	3.53191	RASGRF1	Ras protein-specific guanine nucleotide-releasing factor 1
7990839	3.38347	3.71835	3.38397	STARD5	StAR-related lipid transfer (START) domain containing 5
8009951	2.47001	3.74139	3.76143	ITGB4	integrin, beta 4
8018761	2.80909	2.90454	2.93727	ST6GALNAC2	ST6 (alpha-N-acetyl-neuraminyl-2,3-beta-galactosyl-1,3)-N-acetylgalactosaminide alpha-2,6-sialyltransferase 2
8019486	2.45855	2.73608	2.99129	SECTM1	secreted and transmembrane 1
8022283	2.94787	2.97964	2.89221	FAM38B	family with sequence similarity 38, member B
8022295	2.40046	2.56472	2.4313	C18orf30	chromosome 18 open reading frame 30
8022310	4.62198	4.65907	4.70037	C18orf58	chromosome 18 open reading frame 58
8066619	2.18533	2.12235	2.27089	PLTP	phospholipid transfer protein
8067955	3.39614	2.97875	3.73189	CXADR	coxsackie virus and adenovirus receptor
8069582	4.78118	4.64268	4.77299	PRSS7	protease, serine, 7 (enterokinase)
8080964	2.03248	3.82862	3.34067	GLT8D4	glycosyltransferase 8 domain containing 4
8084219	3.72782	2.96433	2.71773	KLHL24	kelch-like 24 (Drosophila)
8092134	2.57495	3.03171	2.73175	PLD1	phospholipase D1, phosphatidylcholine-specific
8095870	2.23236	2.6982	2.95178	CCNG2	cyclin G2
8099912	2.54237	3.20376	2.3695	C4orf34	chromosome 4 open reading frame 34
8102831	2.67386	5.90663	4.1659	OSAP	ovary-specific acidic protein
8111941	2.36891	3.26115	2.6711	HMGCS1	3-hydroxy-3-methylglutaryl-Coenzyme A synthase 1 (soluble)
8118111	3.0646	4.24403	4.2882	HCP5	HLA complex P5
8121076	2.67276	2.62027	2.35497	PNRC1	proline-rich nuclear receptor coactivator 1
8121749	2.11824	4.01495	2.43548	GJA1	gap junction protein, alpha 1, 43kDa
8122099	2.13748	2.0416	2.51714	ENPP1	ectonucleotide pyrophosphatase/phosphodiesterase 1
8129392	2.25265	3.47924	3.60946	KIAA0408|C6orf174	KIAA0408 | chromosome 6 open reading frame 174
8130422	2.09666	2.0461	2.30216	CNKSR3	CNKSR family member 3
8131844	5.06057	4.85986	3.43126	GPNMB	glycoprotein (transmembrane) nmb
8135392	2.01323	2.12982	2.12732	HBP1	HMG-box transcription factor 1
8138805	2.2075	2.21208	2.04948	CPVL	carboxypeptidase, vitellogenic-like
8140650	3.50618	2.48391	2.26674	SEMA3E	sema domain, immunoglobulin domain (Ig), short basic domain, secreted, (semaphorin) 3E
8146863	2.46311	2.10781	2.10442	SULF1	sulfatase 1
8150714	2.7166	2.78572	3.23925	PCMTD1	protein-L-isoaspartate (D-aspartate) O-methyltransferase domain containing 1
8160346	2.87646	4.49647	3.47459	PTPLAD2	protein tyrosine phosphatase-like A domain containing 2
8177222	2.32762	22.9362	26.2641	CD24
